# Supplementary material for: Immune-related 3-lncRNA signature with prognostic connotation in a multi-cancer setting
Source: Springer Nature journal article supplement (doi:10.1186/s12967-022-03654-7), 2022-09-30

A.

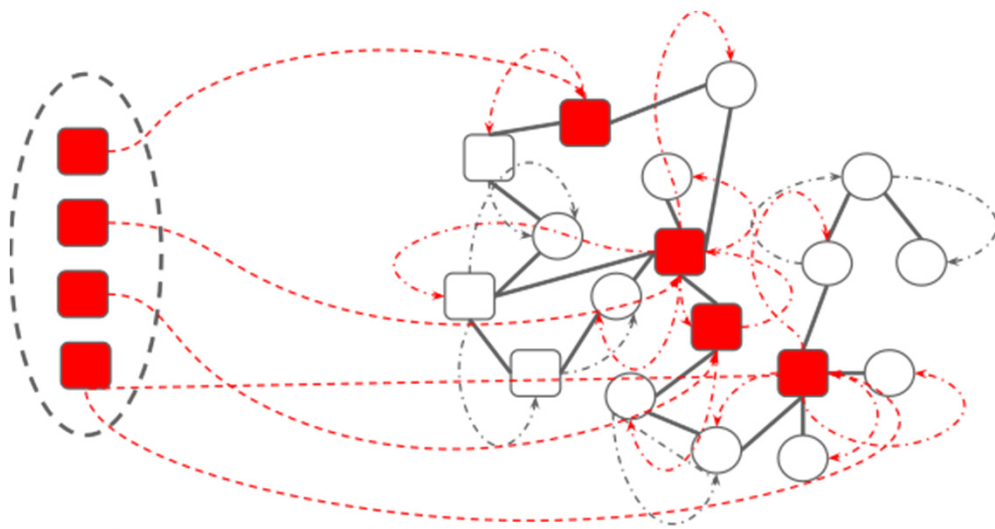

- mRNA
- lncRNA
- Differentially expressed ir-lncRNA
- Edges in the CNC network i.e. true edges between lncRNA-lncRNA, lncRNA-mRNA and mRNA-mRNA
- -> Influence of lncRNAs or mRNAs directly reachable from a lncRNAs, to their neighbors.
- -> Influence of lncRNAs to their immediate neighbors

B.

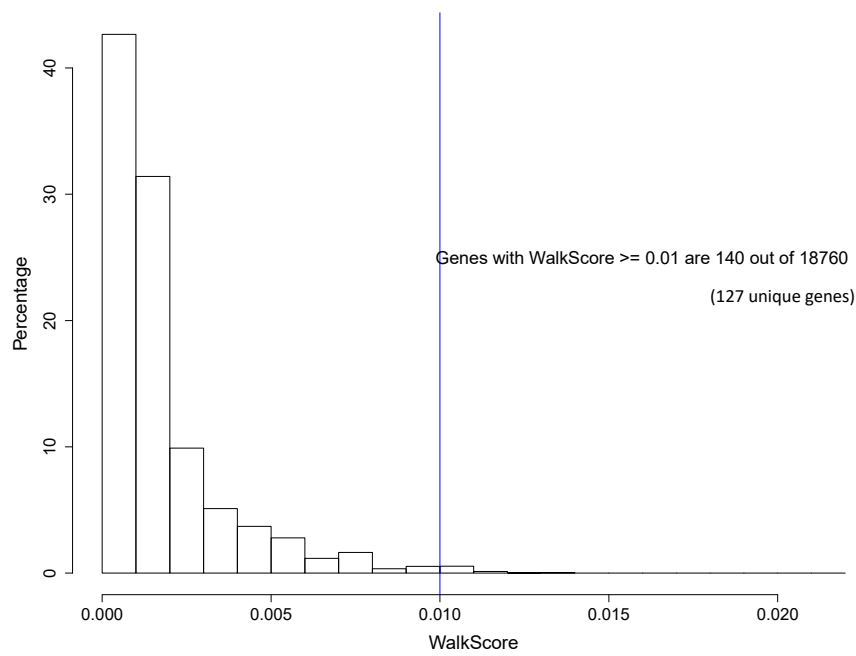

Supplement: MOESM1 [file 23558706]
