# Supplementary material for: Immune-related 3-lncRNA signature with prognostic connotation in a multi-cancer setting
Source: Springer Nature journal article supplement (doi:10.1186/s12967-022-03654-7), 2022-09-30

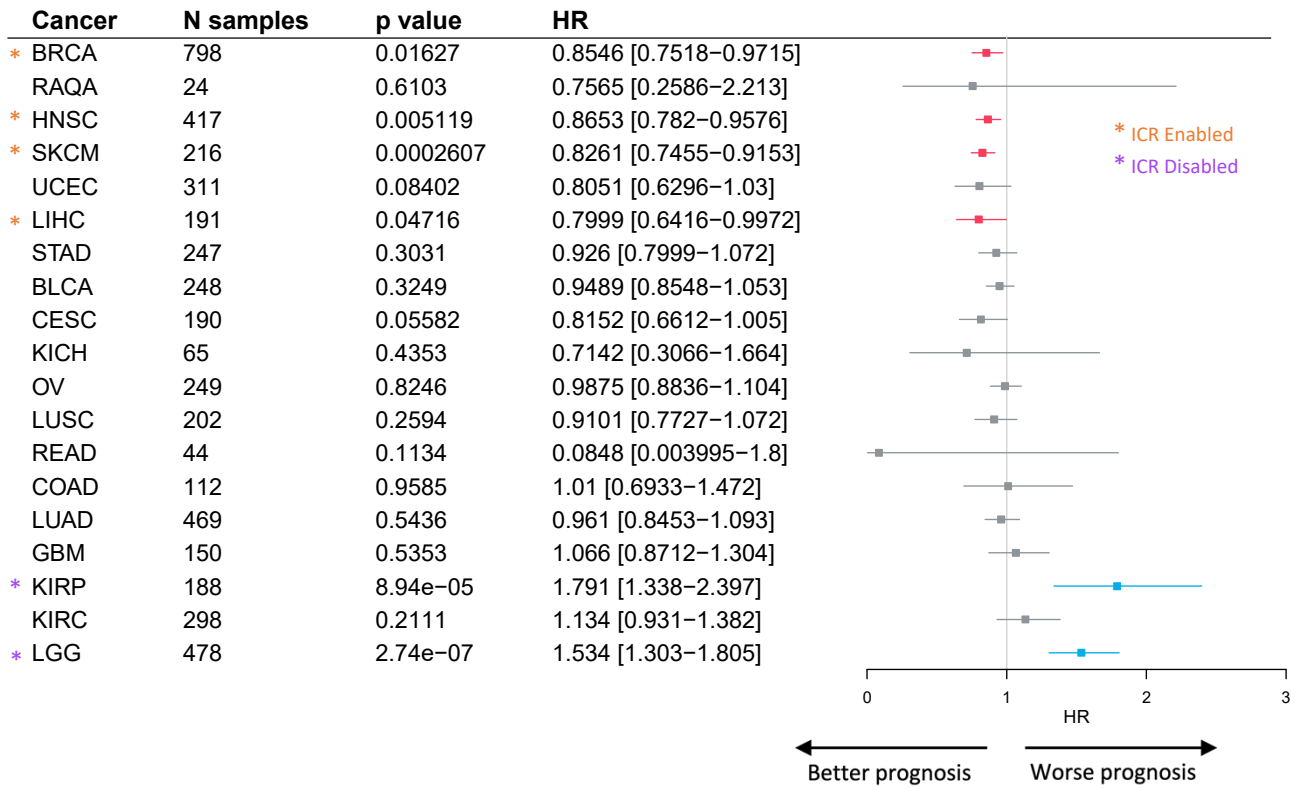

Supplement: MOESM6 [file 23558706]
