# Supplementary material for: Immune-related 3-lncRNA signature with prognostic connotation in a multi-cancer setting
Source: Springer Nature journal article supplement (doi:10.1186/s12967-022-03654-7), 2022-09-30
Supplement: MOESM8 [file 23558706]

Survival probability

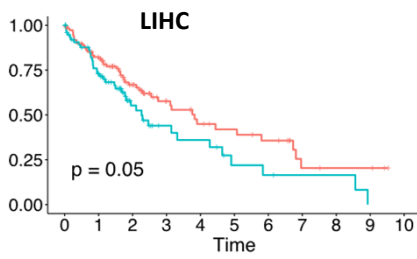

| Number at risk |                               |
|----------------|-------------------------------|
| —              | 111 83 45 25 17 14 11 4 3 3 0 |
| —              | 80 49 20 11 9 4 3 2 2 0 0     |

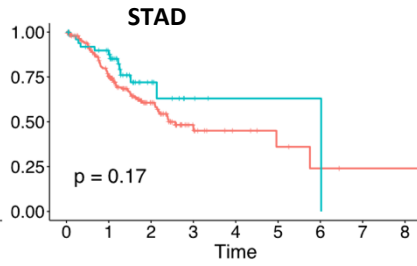

| Number at risk |                         |
|----------------|-------------------------|
| —              | 195 123 52 15 7 4 2 1 1 |
| —              | 52 40 11 3 1 1 1 0 0    |

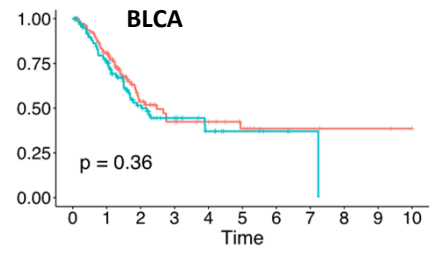

| Number at risk |                              |
|----------------|------------------------------|
| —              | 114 83 33 18 15 10 5 5 4 4 3 |
| —              | 134 89 32 17 9 5 3 1 0 0 0   |

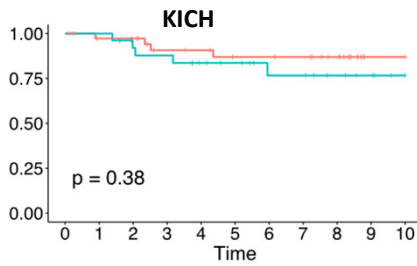

| Number at risk |                                |
|----------------|--------------------------------|
| —              | 39 34 33 26 25 22 22 21 16 4 4 |
| —              | 26 26 22 21 17 15 11 11 7 5 2  |

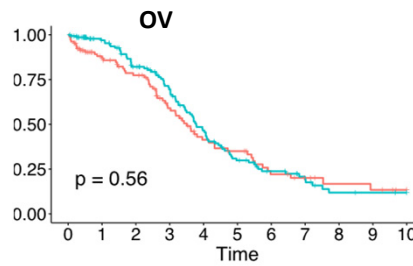

| Number at risk |                                 |
|----------------|---------------------------------|
| —              | 105 77 64 42 26 21 12 8 5 4 1   |
| —              | 144 115 91 71 46 28 18 12 6 5 4 |

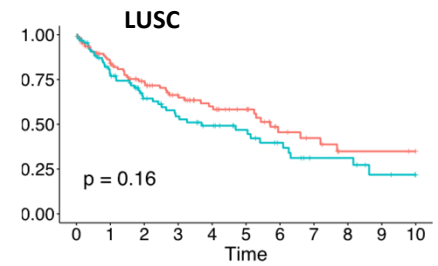

| Number at risk |                                |
|----------------|--------------------------------|
| —              | 111 81 61 46 35 28 15 12 7 7 6 |
| —              | 91 62 42 32 26 20 14 8 8 4 2   |

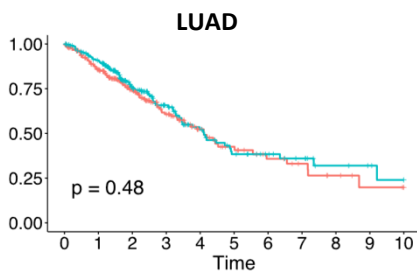

| Number at risk |                                  |
|----------------|----------------------------------|
| —              | 249 185 107 62 34 22 14 10 6 3 2 |
| —              | 220 184 98 61 37 24 18 13 7 5 3  |

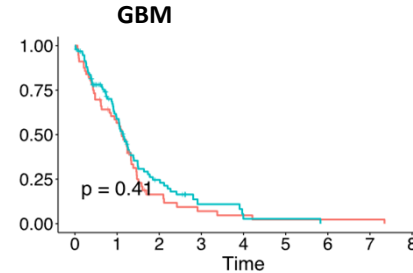

| Number at risk |                      |
|----------------|----------------------|
| —              | 56 30 7 3 2 1 1 1 0  |
| —              | 94 42 15 4 1 1 0 0 0 |

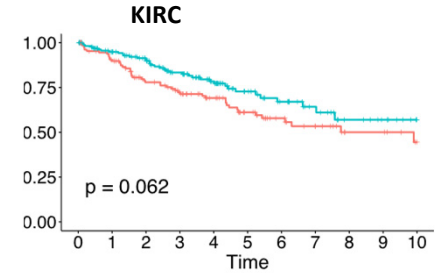

| Number at risk |                                   |
|----------------|-----------------------------------|
| —              | 133 112 87 74 58 40 28 20 12 12 7 |
| —              | 165 141 120 94 69 43 31 20 11 7 1 |
